# Supplementary material for: Symmetry-directed complex tessellation of irregular polygons from a single molecular precursor
Source: Royal Society of Chemistry journal article supplement (doi:10.1039/d6sc00180g), 2026-04-29
Supplement: d6sc00180g1.pdf [file d6sc00180g1.pdf]

## Supplementary Information for:

# Symmetry-Directed Complex Tessellation of Irregular Polygons from a Single Molecular Precursor

Wenya Zhai<sup>a</sup>, Zengfu Ou<sup>b</sup>, Ye Chen<sup>a</sup>, Haoyuan Zang<sup>a</sup>, Donghui Guo<sup>a,\*</sup>, and Jingcheng Li<sup>a,\*</sup>

<sup>a</sup> *Guangdong Provincial Key Laboratory of Magnetoelectric Physics and Devices, School of Physics, Sun Yat-sen University, Guangzhou 510275, China*

<sup>b</sup> *College of Physics and Electronic Information Engineering, Guilin University of Technology, Guilin 541004, China*

E-mail: guodonghui@mail.sysu.edu.cn; lijch73@mail.sysu.edu.cn

## 1. Structural evolution of molecular superlattices by elevated annealing temperatures

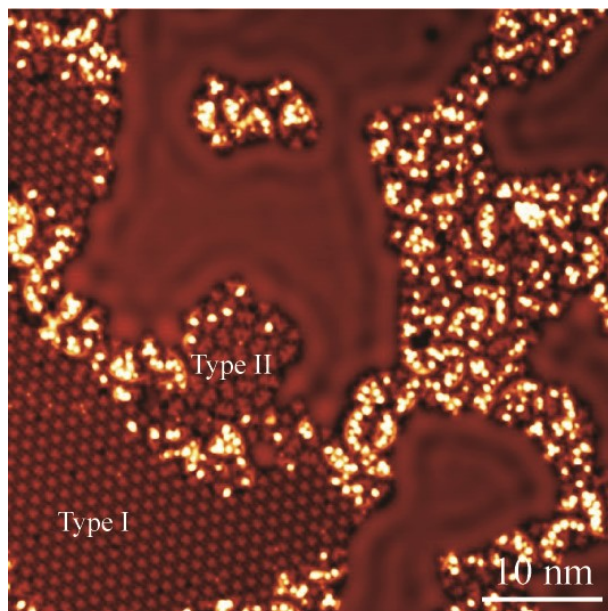

**Figure S1:** STM images of DBPFOH molecules deposited on Ag(111) substrate kept at 150 °C followed by annealing at 200 °C ( $V= 100$  mV  $I= 50$ pA). The surface is dominated by Type I molecular superlattice, with a small amount of Type II coexisting.

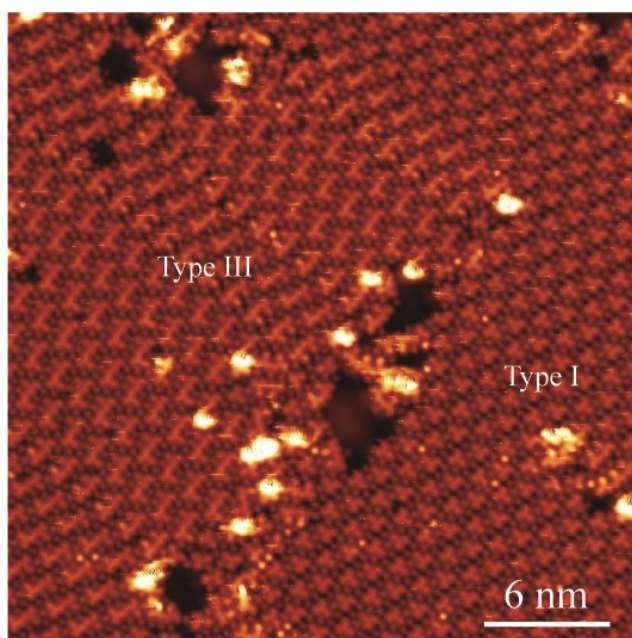

**Figure S2:** STM images of DBPFOH molecules deposited on Ag(111) substrate kept at 150 °C followed by annealing at 230 °C ( $V= 100$  mV  $I= 50$ pA). Type I and Type III (II) molecular superlattices coexist on the surface (only Type III are shown here).

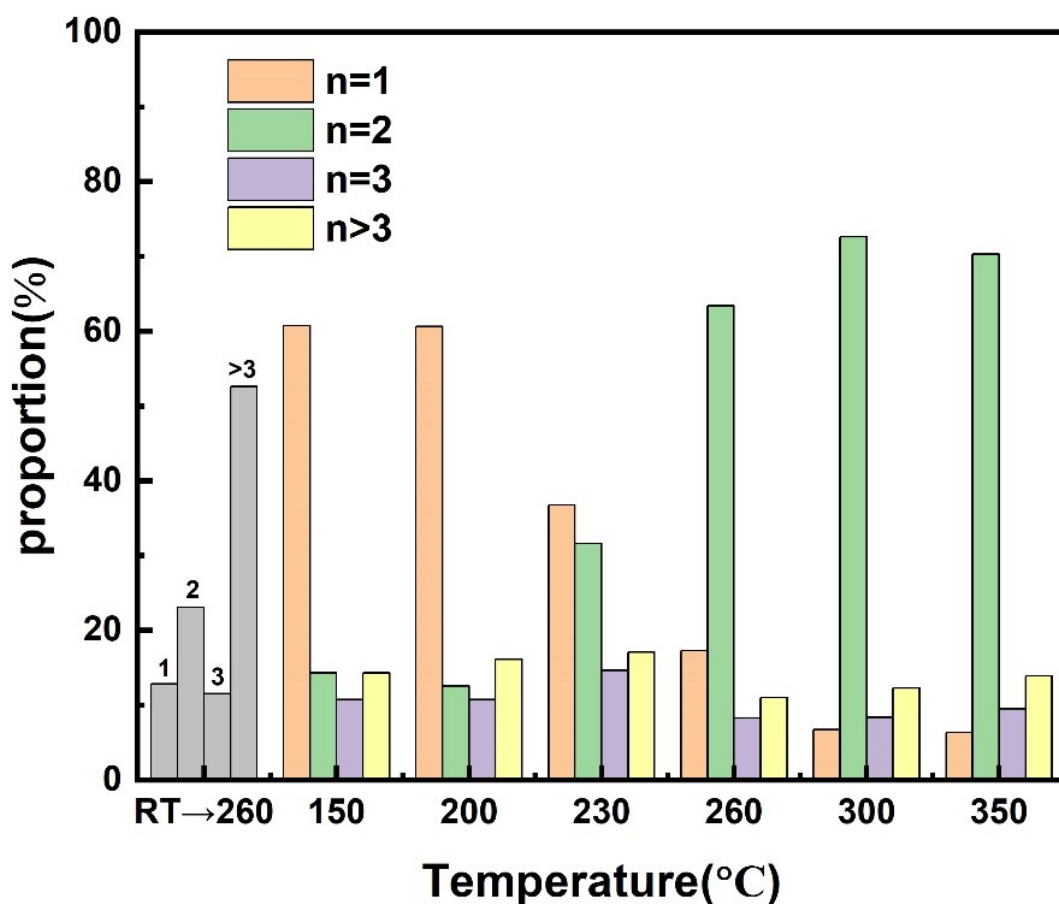

**Figure S3:** Statistics of monomers, dimers, trimers and long chains under different annealing processes, where  $n$  refers to the number of precursor molecules,  $n = 1$ : monomers;  $n = 2$ : dimers;  $n = 3$ : trimers;  $n > 3$ : long chains. Gray bars are results from the samples that DBPFOH molecules are deposited on Ag(111) substrate kept at room temperature followed by annealing at 260 °C. Colored bars are results from the samples that DBPFOH molecules are deposited on Ag(111) substrate kept at 150 °C followed by stepwise annealing as noted in the figure. The statistical data for each temperature are derived from STM images covering an average area of 0.3  $\mu\text{m}^2$ .

## 2. BR-STM image of Type I, Type II, Type III superlattice with model structures imposed

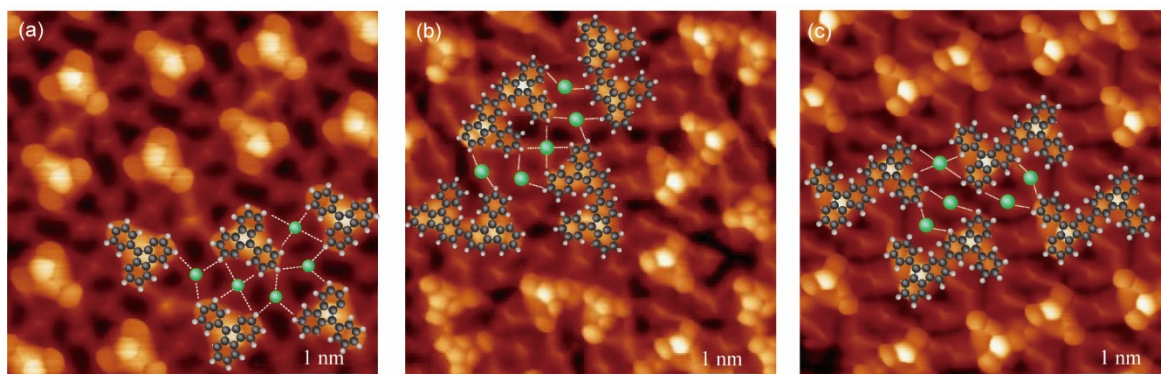

**Figure S4:** Zoom-in BR-STM images of Type I (a), Type II (b) and Type III (c) molecular superlattices with model structures imposed on top ( $V=2$  mV).

## 3. Intramolecular hydrogen transfers mediated reaction pathway

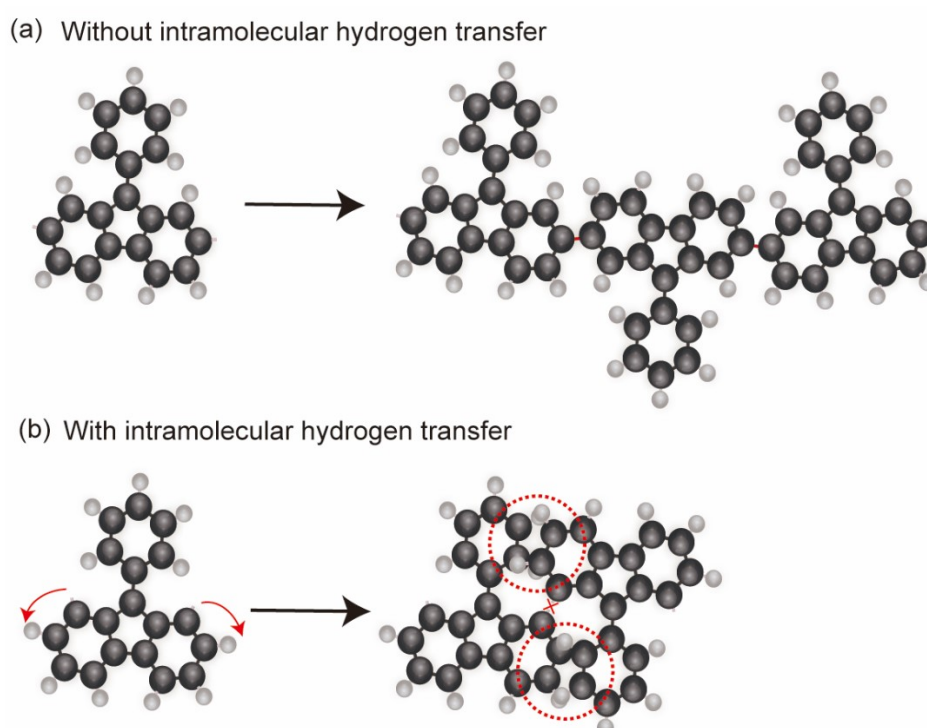

**Figure S5:** Reaction pathways of DBPFOH on Ag(111): (a) Ullmann coupling occurs when no intramolecular hydrogen transfer is involved (indicated by red bonds); (b) intramolecular hydrogen transfer suppresses Ullmann coupling due to steric hindrance (indicated by dashed circles).

#### 4. Single irregular hexagons fail to tile

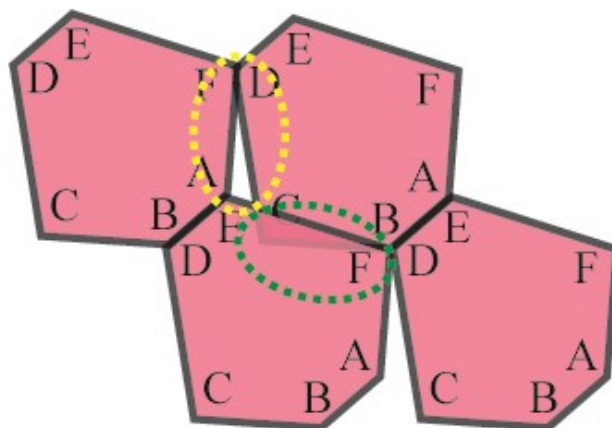

**Figure S6:** Irregular hexagons with  $C_s$  symmetry (Type I in the manuscript) fail to form a continuous tiling via self-translation, resulting in gaps (indicated by dashed yellow circles) and overlaps (indicated by dashed green circles) in their packing arrangement.

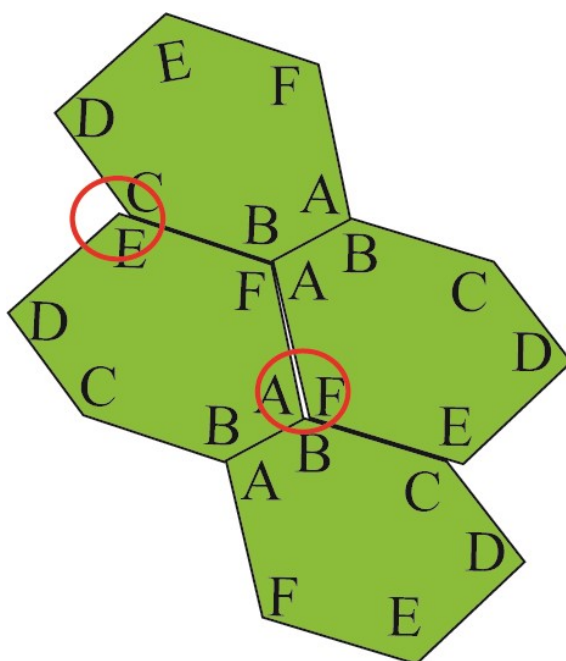

**Figure S7:** Irregular hexagons with no symmetry (Type II in the manuscript) fail to form a continuous tiling via self-translation, resulting in gaps (indicated by red circles) in their packing arrangement.

## 5. Two hexagons (Type I) connected along the edge CD(EF)

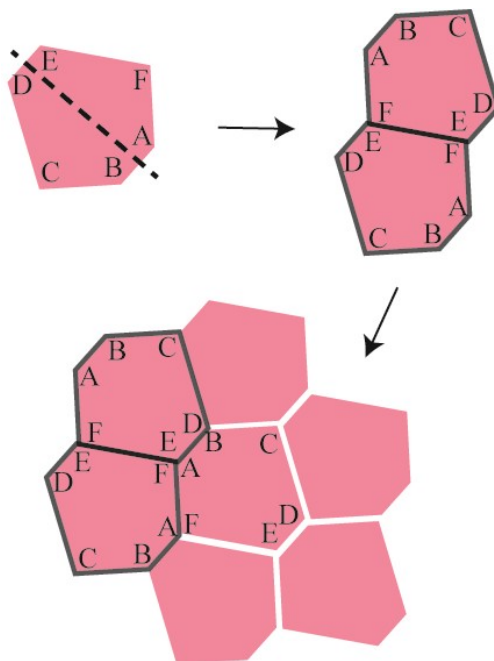

**Figure S8:** Two hexagons (Type I) connected along the edge CD(EF) exhibit  $C_2$  symmetry and can tile the surface.

## 6. Tiling of flower motif without central monomer in type II configuration

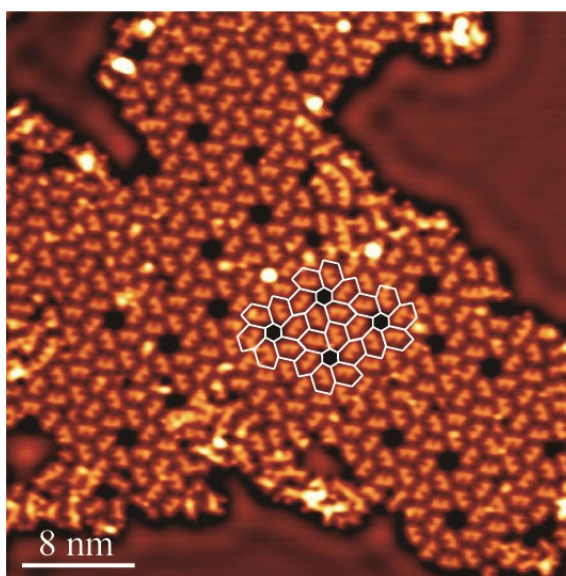

**Figure S9:** STM image of Type II configuration without a central monomer ( $V= 100\text{mV}$ ,  $I= 50\text{pA}$ ). Monomers disappear upon further annealing of the sample (Figure 3 in manuscript) to  $300\text{ }^\circ\text{C}$ , yet the characteristic tiling pattern remains.
